# Supplementary material for: Analysis of the Basidiomycete Coprinopsis cinerea Reveals Conservation of the Core Meiotic Expression Program over Half a Billion Years of Evolution
Source: PLoS Genet. 2010 Sep 23;6(9):e1001135. doi: 10.1371/journal.pgen.1001135 (PMC2944786; doi:10.1371/journal.pgen.1001135)
Supplement: Table S3 — GO analysis of C. cinerea gene clusters. Gene ontology (GO) enrichment analysis was performed for each gene cluster using EASE [39]. Enrichments were discarded if only one gene of a particular class were identified. Enrichments with a Fisher's Exact score >0.01 were also discarded. (0.08 MB XLS) [file pgen.1001135.s005.xls]

## Sheet: Sheet1
Table S3: GO analysis of C. cinerea gene clusters
Gene ontology (GO) enrichment analysis was performed for each gene cluster using EASE.
Enrichments were discarded if only one gene of a particular class were identified. Enrichments with a Fisher’s Exact score < 0.01 were also discarded.
Cluster	GO ID	GO Annotation	Fisher's Exact Score
1	GO:0005488	binding	8.28e-05
1	GO:0005622	intracellular	0.000318
1	GO:0044424	intracellular part	0.00037
1	GO:0065004	protein-DNA complex assembly	0.00044
1	GO:0003676	nucleic acid binding	0.00109
1	GO:0005737	cytoplasm	0.0012
1	GO:0044260	cellular macromolecule metabolic process	0.00121
1	GO:0044267	cellular protein metabolic process	0.00148
1	GO:0044237	cellular metabolic process	0.00168
1	GO:0006352	transcription initiation	0.00174
1	GO:0019538	protein metabolic process	0.00178
1	GO:0044444	cytoplasmic part	0.00298
1	GO:0009987	cellular process	0.0038
1	GO:0009059	macromolecule biosynthetic process	0.00408
1	GO:0006412	translation	0.00464
1	GO:0019238	cyclohydrolase activity	0.0054
1	GO:0043283	biopolymer metabolic process	0.00614
1	GO:0004812	aminoacyl-tRNA ligase activity	0.00799
1	GO:0016875	ligase activity, forming carbon-oxygen bonds	0.00799
1	GO:0016876	ligase activity, forming aminoacyl-tRNA and related compounds	0.00799
1	GO:0006418	tRNA aminoacylation for protein translation	0.00811
1	GO:0043039	tRNA aminoacylation	0.00811
1	GO:0043038	amino acid activation	0.00811
1	GO:0006457	protein folding	0.00964
1	GO:0016814	hydrolase activity, acting on carbon-nitrogen (but not peptide) bonds, in cyclic amidines	0.00982
2	GO:0044249	cellular biosynthetic process	4.6e-05
2	GO:0004579	dolichyl-diphosphooligosaccharide-protein glycotransferase activity	0.000542
2	GO:0006412	translation	0.000549
2	GO:0003735	structural constituent of ribosome	0.000987
2	GO:0044237	cellular metabolic process	0.00111
2	GO:0009058	biosynthetic process	0.00113
2	GO:0004576	oligosaccharyl transferase activity	0.0016
2	GO:0005622	intracellular	0.00174
2	GO:0051493	regulation of cytoskeleton organization and biogenesis	0.00186
2	GO:0030833	regulation of actin filament polymerization	0.00186
2	GO:0032956	regulation of actin cytoskeleton organization and biogenesis	0.00186
2	GO:0008064	regulation of actin polymerization and/or depolymerization	0.00186
2	GO:0030832	regulation of actin filament length	0.00186
2	GO:0033043	regulation of organelle organization and biogenesis	0.00186
2	GO:0032535	regulation of cellular component size	0.00186
2	GO:0044267	cellular protein metabolic process	0.00247
2	GO:0009059	macromolecule biosynthetic process	0.00275
2	GO:0019538	protein metabolic process	0.00302
2	GO:0005759	mitochondrial matrix	0.00334
2	GO:0031980	mitochondrial lumen	0.00334
2	GO:0030041	actin filament polymerization	0.00366
2	GO:0008154	actin polymerization and/or depolymerization	0.00366
2	GO:0051128	regulation of cellular component organization and biogenesis	0.00366
2	GO:0004298	threonine endopeptidase activity	0.00376
2	GO:0044260	cellular macromolecule metabolic process	0.0045
2	GO:0000377	RNA splicing, via transesterification reactions with bulged adenosine as nucleophile	0.00687
2	GO:0000398	nuclear mRNA splicing, via spliceosome	0.00687
2	GO:0000375	RNA splicing, via transesterification reactions	0.00687
2	GO:0016721	oxidoreductase activity, acting on superoxide radicals as acceptor	0.00765
2	GO:0004784	superoxide dismutase activity	0.00765
2	GO:0044444	cytoplasmic part	0.00875
2	GO:0006800	oxygen and reactive oxygen species metabolic process	0.00885
2	GO:0006801	superoxide metabolic process	0.00885
2	GO:0043229	intracellular organelle	0.00914
2	GO:0043226	organelle	0.00934
2	GO:0003899	DNA-directed RNA polymerase activity	0.00938
3	GO:0044238	primary metabolic process	2.84e-08
3	GO:0044237	cellular metabolic process	3.66e-08
3	GO:0003676	nucleic acid binding	1.09e-07
3	GO:0022613	ribonucleoprotein complex biogenesis and assembly	8.18e-07
3	GO:0006412	translation	1.55e-06
3	GO:0065003	macromolecular complex assembly	3.33e-06
3	GO:0044249	cellular biosynthetic process	4.68e-06
3	GO:0006413	translational initiation	6.74e-06
3	GO:0003743	translation initiation factor activity	7.31e-06
3	GO:0008135	translation factor activity, nucleic acid binding	8.45e-06
3	GO:0045182	translation regulator activity	8.45e-06
3	GO:0005622	intracellular	8.92e-06
3	GO:0044424	intracellular part	1.04e-05
3	GO:0022607	cellular component assembly	1.36e-05
3	GO:0022618	protein-RNA complex assembly	2.86e-05
3	GO:0008152	metabolic process	6.75e-05
3	GO:0019538	protein metabolic process	8.33e-05
3	GO:0043170	macromolecule metabolic process	0.000122
3	GO:0009987	cellular process	0.00013
3	GO:0009058	biosynthetic process	0.00017
3	GO:0044267	cellular protein metabolic process	0.000174
3	GO:0044260	cellular macromolecule metabolic process	0.000192
3	GO:0009059	macromolecule biosynthetic process	0.000196
3	GO:0015995	chlorophyll biosynthetic process	0.000253
3	GO:0015994	chlorophyll metabolic process	0.000253
3	GO:0032991	macromolecular complex	0.000286
3	GO:0009889	regulation of biosynthetic process	0.000298
3	GO:0006417	regulation of translation	0.000298
3	GO:0031326	regulation of cellular biosynthetic process	0.000298
3	GO:0006446	regulation of translational initiation	0.000435
3	GO:0051003	ligase activity, forming nitrogen-metal bonds, forming coordination complexes	0.000511
3	GO:0051002	ligase activity, forming nitrogen-metal bonds	0.000511
3	GO:0005737	cytoplasm	0.000653
3	GO:0046148	pigment biosynthetic process	0.000982
3	GO:0042440	pigment metabolic process	0.00124
3	GO:0015979	photosynthesis	0.00132
3	GO:0016851	magnesium chelatase activity	0.00145
3	GO:0016874	ligase activity	0.00196
3	GO:0033014	tetrapyrrole biosynthetic process	0.00197
3	GO:0006779	porphyrin biosynthetic process	0.00197
3	GO:0051246	regulation of protein metabolic process	0.00218
3	GO:0006778	porphyrin metabolic process	0.00227
3	GO:0033013	tetrapyrrole metabolic process	0.00227
3	GO:0019031	viral envelope	0.00235
3	GO:0019748	secondary metabolic process	0.00285
3	GO:0006139	nucleobase, nucleoside, nucleotide and nucleic acid metabolic process	0.00294
3	GO:0004112	cyclic-nucleotide phosphodiesterase activity	0.0043
3	GO:0004114	3',5'-cyclic-nucleotide phosphodiesterase activity	0.0043
3	GO:0044444	cytoplasmic part	0.00443
3	GO:0005488	binding	0.00473
3	GO:0046483	heterocycle metabolic process	0.00562
3	GO:0006364	rRNA processing	0.00683
3	GO:0016072	rRNA metabolic process	0.00683
3	GO:0030529	ribonucleoprotein complex	0.00712
3	GO:0003899	DNA-directed RNA polymerase activity	0.00788
3	GO:0016987	sigma factor activity	0.00813
3	GO:0016887	ATPase activity	0.0087
3	GO:0016192	vesicle-mediated transport	0.00899
3	GO:0043283	biopolymer metabolic process	0.00945
3	GO:0006520	amino acid metabolic process	0.0098
4	GO:0003735	structural constituent of ribosome	4e-52
4	GO:0030529	ribonucleoprotein complex	3.84e-46
4	GO:0005840	ribosome	1.86e-42
4	GO:0006412	translation	4.26e-37
4	GO:0032991	macromolecular complex	2.46e-30
4	GO:0009059	macromolecule biosynthetic process	7.21e-29
4	GO:0044444	cytoplasmic part	1.07e-26
4	GO:0044249	cellular biosynthetic process	6.24e-23
4	GO:0043228	non-membrane-bound organelle	2.31e-21
4	GO:0043232	intracellular non-membrane-bound organelle	2.31e-21
4	GO:0005737	cytoplasm	3.37e-21
4	GO:0044267	cellular protein metabolic process	9.49e-20
4	GO:0019538	protein metabolic process	2.31e-19
4	GO:0044260	cellular macromolecule metabolic process	1.42e-18
4	GO:0009058	biosynthetic process	2.89e-18
4	GO:0044424	intracellular part	9.03e-16
4	GO:0005622	intracellular	9.72e-13
4	GO:0043170	macromolecule metabolic process	1.4e-12
4	GO:0005198	structural molecule activity	2.19e-11
4	GO:0043229	intracellular organelle	1.16e-09
4	GO:0043226	organelle	1.25e-09
4	GO:0044237	cellular metabolic process	1.25e-08
4	GO:0044238	primary metabolic process	1.65e-08
4	GO:0009987	cellular process	5.37e-06
4	GO:0004298	threonine endopeptidase activity	2.2e-05
4	GO:0005839	proteasome core complex (sensu Eukaryota)	0.000224
4	GO:0000502	proteasome complex (sensu Eukaryota)	0.000224
4	GO:0003723	RNA binding	0.000957
4	GO:0042254	ribosome biogenesis and assembly	0.00102
4	GO:0019941	modification-dependent protein catabolic process	0.00175
4	GO:0044257	cellular protein catabolic process	0.00175
4	GO:0043632	modification-dependent macromolecule catabolic process	0.00175
4	GO:0006511	ubiquitin-dependent protein catabolic process	0.00175
4	GO:0051603	proteolysis involved in cellular protein catabolic process	0.00175
4	GO:0030163	protein catabolic process	0.00242
4	GO:0008152	metabolic process	0.00292
4	GO:0016072	rRNA metabolic process	0.00376
4	GO:0006364	rRNA processing	0.00376
4	GO:0043285	biopolymer catabolic process	0.0038
4	GO:0006396	RNA processing	0.00537
4	GO:0016044	membrane organization and biogenesis	0.00544
4	GO:0016071	mRNA metabolic process	0.00647
4	GO:0006414	translational elongation	0.00697
4	GO:0044464	cell part	0.00858
4	GO:0005623	cell	0.00858
5	GO:0006974	response to DNA damage stimulus	8.03e-06
5	GO:0006281	DNA repair	8.03e-06
5	GO:0009719	response to endogenous stimulus	8.89e-06
5	GO:0006298	mismatch repair	9.71e-06
5	GO:0045005	maintenance of fidelity during DNA-dependent DNA replication	9.71e-06
5	GO:0006261	DNA-dependent DNA replication	1.38e-05
5	GO:0006950	response to stress	1.5e-05
5	GO:0050896	response to stimulus	8.5e-05
5	GO:0006259	DNA metabolic process	0.000271
5	GO:0006260	DNA replication	0.000316
5	GO:0044238	primary metabolic process	0.000393
5	GO:0006139	nucleobase, nucleoside, nucleotide and nucleic acid metabolic process	0.000533
5	GO:0043170	macromolecule metabolic process	0.000724
5	GO:0003684	damaged DNA binding	0.000735
5	GO:0043283	biopolymer metabolic process	0.00161
5	GO:0008175	tRNA methyltransferase activity	0.00172
5	GO:0044237	cellular metabolic process	0.00319
5	GO:0008173	RNA methyltransferase activity	0.0042
5	GO:0003676	nucleic acid binding	0.00509
5	GO:0003677	DNA binding	0.00587
5	GO:0032559	adenyl ribonucleotide binding	0.0077
5	GO:0005524	ATP binding	0.0077
5	GO:0008094	DNA-dependent ATPase activity	0.00962
5	GO:0000287	magnesium ion binding	0.00975
6	GO:0032787	monocarboxylic acid metabolic process	0.000972
6	GO:0006631	fatty acid metabolic process	0.00246
6	GO:0004096	catalase activity	0.0029
6	GO:0015370	solute:sodium symporter activity	0.00596
6	GO:0006633	fatty acid biosynthetic process	0.00602
6	GO:0046394	carboxylic acid biosynthetic process	0.00602
6	GO:0016053	organic acid biosynthetic process	0.00602
7	GO:0005975	carbohydrate metabolic process	4.48e-05
7	GO:0003825	alpha,alpha-trehalose-phosphate synthase (UDP-forming) activity	0.000117
7	GO:0005992	trehalose biosynthetic process	0.000304
7	GO:0046351	disaccharide biosynthetic process	0.000304
7	GO:0016051	carbohydrate biosynthetic process	0.000453
7	GO:0044262	cellular carbohydrate metabolic process	0.00067
7	GO:0046527	glucosyltransferase activity	0.000955
7	GO:0035251	UDP-glucosyltransferase activity	0.000955
7	GO:0000139	Golgi membrane	0.00196
7	GO:0015980	energy derivation by oxidation of organic compounds	0.00266
7	GO:0005991	trehalose metabolic process	0.00325
7	GO:0005984	disaccharide metabolic process	0.00325
7	GO:0006112	energy reserve metabolic process	0.00436
7	GO:0008889	glycerophosphodiester phosphodiesterase activity	0.00559
7	GO:0008081	phosphoric diester hydrolase activity	0.0068
7	GO:0006071	glycerol metabolic process	0.00721
7	GO:0019751	polyol metabolic process	0.00721
7	GO:0006066	alcohol metabolic process	0.00762
7	GO:0044431	Golgi apparatus part	0.00815
8	GO:0005618	cell wall	0.00315
8	GO:0009084	glutamine family amino acid biosynthetic process	0.0069
8	GO:0005509	calcium ion binding	0.00709
8	GO:0005199	structural constituent of cell wall	0.0077
8	GO:0031224	intrinsic to membrane	0.0081
8	GO:0016021	integral to membrane	0.0081
8	GO:0008199	ferric iron binding	0.00841
8	GO:0009847	spore germination	0.00844
9	GO:0016838	carbon-oxygen lyase activity, acting on phosphates	0.000448
9	GO:0016021	integral to membrane	0.00046
9	GO:0031224	intrinsic to membrane	0.00046
9	GO:0044425	membrane part	0.00125
9	GO:0016020	membrane	0.00177
9	GO:0009072	aromatic amino acid family metabolic process	0.00406
9	GO:0016829	lyase activity	0.00506
9	GO:0046417	chorismate metabolic process	0.00613
9	GO:0009073	aromatic amino acid family biosynthetic process	0.00613
9	GO:0005402	cation:sugar symporter activity	0.00635
9	GO:0005403	hydrogen:sugar symporter activity	0.00635
9	GO:0015295	solute:hydrogen symporter activity	0.00635
